# Supplementary material for: Barth Syndrome: Exploring Cardiac Metabolism with Induced Pluripotent Stem Cell-Derived Cardiomyocytes
Source: MDPI journal article supplement (doi:10.3390/metabo9120306), 2019-12-17
Supplement: s1 [file s1]

#### *iPSCM immunostaining protocol*

iPS-CMs were replated onto matrigel-coated coverslips in 6-well plates on day 21. On day 45, cells were washed twice with 1x PBS and fixed with 4% formaldehyde in PBS for 10 minutes at room temperature. Coverslips were washed once more with PBS, then maintained at 30 minutes at room temperature for permeabilization with 0.3% TritonX, and blocking with 3% goat serum in 1x PBS. Primary antibodies anti-TNNI3 (Invitrogen, PA1-86820) 1:750, IRX4 (Invitrogen, PA5-40481) 1:750, and anti- $\alpha$ -actinin (Invitrogen, MA1-22863) were diluted in 0.3% TritonX, 2% goat serum in 1x PBS. Cells were incubated with primary antibodies at 4°C overnight, and then were washed 3 times with 1x PBS. Next, cells were incubated with secondary antibodies CF543 (Biotium, 20308) 1:250, AlexaFluor® 555 (Invitrogen, A27017) 1:200, and AlexaFluor® 488 (Invitrogen, A11059 and A11055) 1:200 for 45 minutes at room temperature, followed by three washes with 1x PBS for five minutes. Coverslips were mounted onto microscope slides using EverBrite mounting medium with DAPI (Biotium). Cells were visualized with Nikon A1R confocal microscope.

#### *GCMS method for glucose uptake*

GCMS analysis was carried out with a 5977 GC-MS (Agilent) operated in EI mode and equipped with an HP-5ms column (Agilent). Retention times and fragmentation mass spectra of were confirmed with commercially available standards and the NIST library.

Oven program as following: initial oven temperature 80°C, hold for 3 minutes, then ramp 15°C/minute up to 190°C, ramp 5°C/minute up to 205°C, ramp 1°C/minute up to 212°C and finally ramp 15°C/minute up to 310°C hold for 2 minutes. The complex oven program is required to achieve maximum separation between structural isomers  $^{13}\text{C}_6$ -glucose and galactose (Figure S1). The following ions were monitored under single ion monitoring mode (SIM): m/z 319, for  $^{13}\text{C}_6$ -glucose, and m/z 314 for galactose.

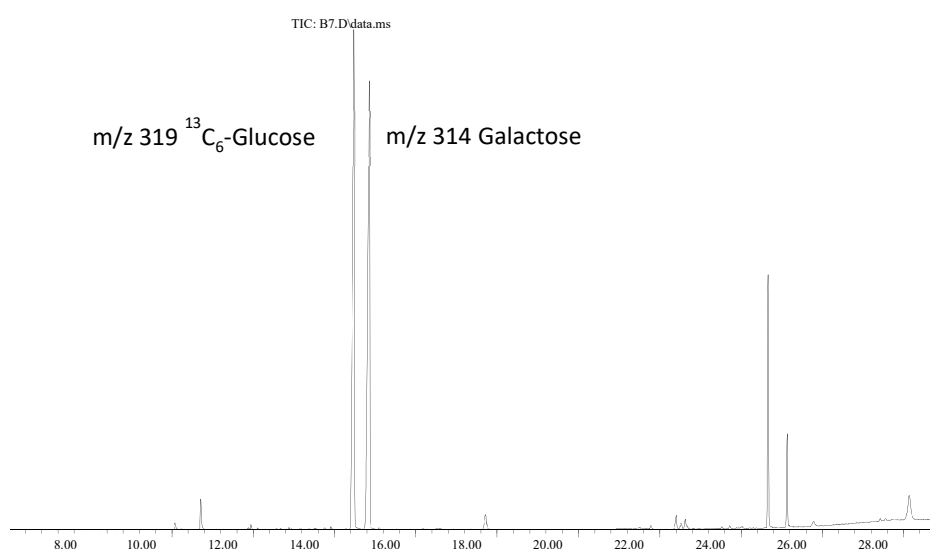

**Figure S1.** GCMS total ion chromatogram (TIC) shows glucose /galactose separation

#### GCMS method for palmitate uptake

GC-MS analysis was carried out with a 5977 GC-MS (Agilent) operated in EI mode and equipped with an HP-5ms column (Agilent). Retention times and fragmentation mass spectra of were confirmed with commercially available standards and the NIST library. Oven program as following: Initial oven temperature set at 100°C, ramp 8°C/minute up to 300°C and hold for 2 minutes. Following ions were monitored: m/z 270 for unlabeled methyl palmitate, m/z 286 for <sup>13</sup>C<sub>16</sub>-labeled methyl palmitate (retention time 14.5 min), m/z 284 for methyl heptadecanoate (retention time 16 min).

#### GCMS method for Krebs cycle intermediates and lactate

GC-MS analysis was carried out with a 5977 GC-MS (Agilent) operated in EI mode and equipped with an HP-5ms column (Agilent). Retention times and fragmentation mass spectra of all metabolites were confirmed with commercially available standards and the NIST library. Unlabeled (M0) ions monitored through the method are presented in Table S1. Oven program as following: initial oven temperature set at 80°C, hold for 3 minutes, then ramp 15°C/minute up to 305°C and hold for 3 minutes.

| Metabolite                            | m/z (SIM) | Retention time |
|---------------------------------------|-----------|----------------|
| <sup>13</sup> C <sub>3</sub> -Lactate | 264       | 9.74           |
| Succinate                             | 289       | 11.89          |
| Fumarate                              | 287       | 12.09          |
| Malate                                | 419       | 14.26          |
| α-ketoglutarate                       | 346,431   | 13.61          |
| Citrate                               | 459       | 17.12          |
| Tricarballic acid (internal standard) | 461       | 15.6           |

**Table S1.** Target ions and retention times for unlabeled (M0) Krebs cycle intermediates and <sup>13</sup>C<sub>3</sub> lactate as MTBSTFA derivatives GCMS analysis

#### LC-MS/MS for acyl carnitines

ESI source temperature 700°C, ion spray voltage + 4500V. Column Waters Xbridge BEH C18, XBridge BEH C18 XP Column, 130Å, 2.5 µm, 2.1 mm x 75 mm. Mobile phase A 0.1 % formic acid in water, mobile phase B 0.1 % formic acid in acetonitrile. Injection volume 1 µl Gradient program:

| Time (min) | Percent of mobile phase B |
|------------|---------------------------|
| 0          | 20                        |
| 1          | 20                        |
| 8          | 37                        |
| 22         | 100                       |
| 26         | 100                       |

|             |    |
|-------------|----|
| <b>26.1</b> | 20 |
| <b>30</b>   | 20 |

**Table S2.** LC gradient program for acyl carnitines analysis

| <b>ID</b>       | <b>Q1<br/>Mass<br/>(Da)</b> | <b>Q3<br/>Mass<br/>(Da)</b> | <b>Dwell<br/>(msec)</b> | <b>DP</b> | <b>EP</b> | <b>CE</b> | <b>CXP</b> |
|-----------------|-----------------------------|-----------------------------|-------------------------|-----------|-----------|-----------|------------|
| <b>C0</b>       | 218                         | 85                          | 15                      | 100       | 2         | 20        | 10         |
| <b>C0 ISTD</b>  | 227                         | 85                          | 15                      | 100       | 2         | 20        | 10         |
| <b>C2</b>       | 260                         | 85                          | 15                      | 100       | 2         | 20        | 10         |
| <b>C2 ISTD</b>  | 263                         | 85                          | 15                      | 100       | 2         | 20        | 10         |
| <b>C3</b>       | 274                         | 85                          | 15                      | 100       | 2         | 20        | 10         |
| <b>C3 ISTD</b>  | 277                         | 85                          | 15                      | 100       | 2         | 20        | 10         |
| <b>C4</b>       | 288                         | 85                          | 15                      | 100       | 2         | 20        | 10         |
| <b>C4 ISTD</b>  | 291                         | 85                          | 15                      | 100       | 2         | 20        | 10         |
| <b>C5</b>       | 302                         | 85                          | 15                      | 100       | 10        | 20        | 10         |
| <b>C4-OH</b>    | 304                         | 85                          | 15                      | 100       | 2         | 20        | 10         |
| <b>C5 ISTD</b>  | 311                         | 85                          | 15                      | 100       | 10        | 20        | 10         |
| <b>C6</b>       | 316                         | 85                          | 15                      | 100       | 10        | 20        | 10         |
| <b>C6-OH</b>    | 332                         | 85                          | 15                      | 100       | 10        | 20        | 10         |
| <b>C8</b>       | 344                         | 85                          | 15                      | 100       | 8         | 25        | 10         |
| <b>C8 ISTD</b>  | 347                         | 85                          | 15                      | 100       | 8         | 25        | 10         |
| <b>C3-DC</b>    | 360                         | 85                          | 15                      | 100       | 2         | 20        | 10         |
| <b>C12:1</b>    | 398                         | 85                          | 15                      | 100       | 8         | 25        | 10         |
| <b>C12</b>      | 400                         | 85                          | 15                      | 100       | 8         | 25        | 10         |
| <b>C12:1-OH</b> | 414                         | 85                          | 15                      | 100       | 8         | 25        | 10         |
| <b>C12-OH</b>   | 416                         | 85                          | 15                      | 100       | 8         | 25        | 10         |
| <b>C14:2</b>    | 424                         | 85                          | 15                      | 100       | 2         | 30        | 10         |
| <b>C14:1</b>    | 426                         | 85                          | 15                      | 100       | 2         | 30        | 10         |
| <b>C14</b>      | 428                         | 85                          | 15                      | 100       | 2         | 30        | 10         |
| <b>C14 ISTD</b> | 437                         | 85                          | 15                      | 100       | 2         | 30        | 10         |
| <b>C14-OH</b>   | 444                         | 85                          | 15                      | 100       | 2         | 30        | 10         |
| <b>C16:2</b>    | 452                         | 85                          | 15                      | 100       | 2         | 30        | 10         |
| <b>C16:1</b>    | 454                         | 85                          | 15                      | 100       | 2         | 30        | 10         |
| <b>C16</b>      | 456                         | 85                          | 15                      | 100       | 2         | 30        | 10         |
| <b>C16 ISTD</b> | 459                         | 85                          | 15                      | 100       | 2         | 30        | 10         |
| <b>C16-OH</b>   | 472                         | 85                          | 15                      | 100       | 2         | 30        | 10         |
| <b>C18:2</b>    | 480                         | 85                          | 15                      | 100       | 2         | 30        | 10         |
| <b>C18:1</b>    | 482                         | 85                          | 15                      | 100       | 2         | 30        | 10         |

|            |     |    |    |     |   |    |    |
|------------|-----|----|----|-----|---|----|----|
| <b>C18</b> | 484 | 85 | 15 | 100 | 2 | 30 | 10 |
| <b>C22</b> | 510 | 85 | 15 | 100 | 2 | 30 | 10 |

**Table S3.** Acylcarnitines mass spectrometry analysis

| Analyte Peak Name | Retention Time |
|-------------------|----------------|
| <b>C0</b>         | 0.64           |
| <b>C2</b>         | 1.18           |
| <b>C3</b>         | 2.19           |
| <b>C4</b>         | 3.47           |
| <b>C5</b>         | 5.09           |
| <b>C4-OH</b>      | 5.00           |
| <b>C6</b>         | 7.27           |
| <b>C6-OH</b>      | 8.77           |
| <b>C8:1</b>       | 9.11           |
| <b>C8</b>         | 10.34          |
| <b>C3-DC</b>      | 3.02           |
| <b>C4DC</b>       | 4              |
| <b>C12:1</b>      | 13.43          |
| <b>C12</b>        | 14.08          |
| <b>C12-OH</b>     | 14             |
| <b>C14:2</b>      | 15.09          |
| <b>C14:1</b>      | 14.90          |
| <b>C14</b>        | 15.72          |
| <b>C14-OH</b>     | 15.50          |
| <b>C16:1</b>      | 16.01          |
| <b>C16</b>        | 17.11          |
| <b>C16-OH</b>     | 15.50          |
| <b>C18:2</b>      | 16.39          |
| <b>C18:1</b>      | 17.30          |
| <b>C18</b>        | 18.29          |
| <b>C22</b>        | 21.23          |

**Table S4.** Acylcarnitines retention times.

#### *GCMS method for free fatty acids*

Separation was achieved by 5977 GC-MS (Agilent) operated in EI/scan mode and equipped with an HP-5ms column (Agilent). Retention times and fragmentation mass spectra of all metabolites were confirmed with commercially available standards and the NIST library

| Free fatty acid name | Retention time |
|----------------------|----------------|
| Lauric               | 27.1           |
| Myristic             | 30.6           |
| Palmitoleic          | 33.6           |
| Palmitic             | 34             |
| Oleic                | 36.9           |
| Stearic              | 37.3           |

**Table S5:** Retention times for free fatty acids as BSTFA derivatives GCMS analysis
